# Supplementary material
Source: Springer Nature journal article supplement (https://www.springermedizin.de/resource/supplementary/12885_2013_4486_MOESM6_ESM.pdf/9466472)

**A**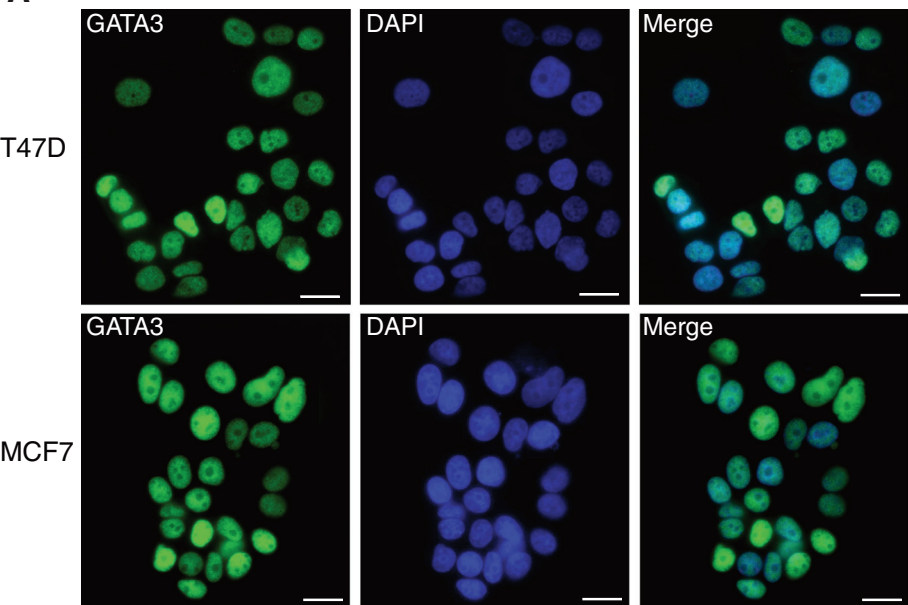**B**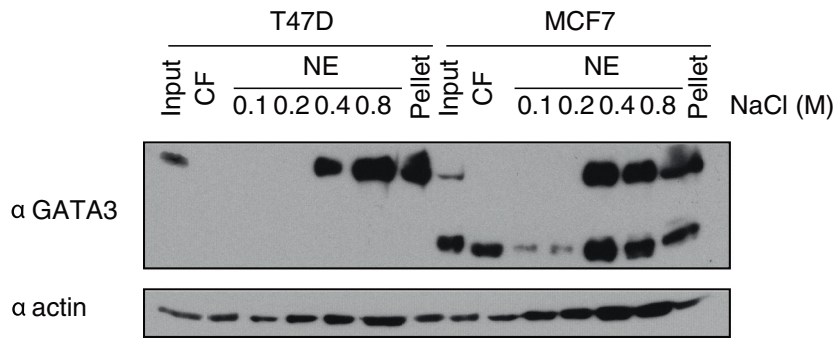

Supplement: MOESM6 [file 9466472]
